# Supplementary material
Source: PubMed Central journal article supplement (PMC2632839)
Supplement: NIHMS3654-supplement-Supp4.pdf [file NIHMS3654-supplement-Supp4.pdf]

**MATRIX SCIENCE Mascot Search Results**

**Protein View**

Match to: **Plasmodium falciparum\_3D7|MAL12|PFL1720w|Pf** Score: **191**  
 Annotation|**Plasmodium falciparum\_Stanford|(protein coding) Serine hydroxymethyltransferase**  
 Found in search of C:\Documents and Settings\Mjffsnjn\Desktop\Niro 7-10 inclusion\_LCA\_1-E,2\_01\_6989.d\Analysis.mgf

Nominal mass (M<sub>r</sub>): **49749**; Calculated pI value: **8.29**  
 NCBI BLAST search of **Plasmodium falciparum\_3D7|MAL12|PFL1720w|Pf** against nr  
 Unformatted [sequence string](#) for pasting into other applications

Variable modifications: Carbamidomethyl (C),Oxidation (M),Heavy IsoLeu  
 Cleavage by Trypsin: cuts C-term side of KR unless next residue is P  
 Sequence Coverage: **19%**

Matched peptides shown in **Bold Red**

1 MFNNDPLQKY **DKELFDLLEK** EKNRQIETIN LIAENLNT AVRECLGDRI  
 51 SNK**YSEGYPH** KRYYGGNDYV DKIEELCYKR ALEAFNVSEE EWGVNVQPLS  
 101 GSAANVQALY ALVGVGKIM GMHLCSGGHL THGFFDEKKK **VSITSDLFES**  
 151 **KLYKCNSEGY** VDMESVRNLA LSFQPKVIIC GYTSYPRDID YKGFREICDE  
 201 VNAYLFADIS HISSFVACNL LNNPFTYADV VTTTHKILR GPRALIFFN  
 251 KKRNPIDQK INSSVFPSPQ GGPHNNK**IAA VACQLK**EVNT PPFKEYTKQV  
 301 LLNSKALAEK LLKR**NLDLVT** **NGTDNHLIVV** **DLR**KYNIITGS KLQETCNAIN  
 351 IALNK**NTIPS** **DVDCVSPSGI** RIGTPALTTR GCKEKDMEFI ADMLLK**AILL**  
 401 **TDELQQK**YGK KLVDFKKGLV NNPKIDELKK EVVQWAKNLP FA

Show predicted peptides also

Sort Peptides By  Residue Number  Increasing Mass  Decreasing Mass

| Start - End | Observed | Mr (expt) | Mr (calc) | Delta | Miss | Sequence                                                                                 |
|-------------|----------|-----------|-----------|-------|------|------------------------------------------------------------------------------------------|
| 10 - 20     | 706.74   | 1411.46   | 1411.72   | -0.27 | 1    | <b>K.YDKELFDLLEK.E</b> ( <a href="#">Ions score 42</a> )                                 |
| 54 - 61     | 490.60   | 979.19    | 979.44    | -0.25 | 0    | <b>K.YSEGYPHK.R</b> ( <a href="#">Ions score 33</a> )                                    |
| 141 - 151   | 613.19   | 1224.36   | 1224.62   | -0.26 | 0    | <b>K.VSITSDLFESK.L</b> ( <a href="#">Ions score 36</a> )                                 |
| 278 - 286   | 486.32   | 970.62    | 972.54    | -1.92 | 0    | <b>K.IAAVACQLK.E</b> Carbamidomethyl (C) ( <a href="#">Ions score 35</a> )               |
| 278 - 286   | 487.13   | 972.24    | 972.54    | -0.30 | 0    | <b>K.IAAVACQLK.E</b> Carbamidomethyl (C) ( <a href="#">Ions score 18</a> )               |
| 278 - 286   | 490.70   | 979.39    | 979.59    | -0.21 | 0    | <b>K.IAAVACQLK.E</b> Carbamidomethyl (C); Heavy IsoLeu ( <a href="#">Ions score 29</a> ) |
| 315 - 333   | 707.83   | 2120.47   | 2120.12   | 0.35  | 0    | <b>R.NLDLVTNGTDNHLIVVDLR.K</b> ( <a href="#">Ions score 3</a> )                          |
| 315 - 333   | 710.28   | 2127.81   | 2127.17   | 0.63  | 0    | <b>R.NLDLVTNGTDNHLIVVDLR.K</b> Heavy IsoLeu ( <a href="#">Ions score 4</a> )             |
| 356 - 371   | 858.90   | 1715.78   | 1715.81   | -0.04 | 0    | <b>K.NTIPSDVDCVSPSGIR.I</b> Carbamidomethyl (C) ( <a href="#">Ions score 5</a> )         |
| 397 - 407   | 635.62   | 1269.22   | 1270.71   | -1.49 | 0    | <b>K.AILLTDELQOK.Y</b> ( <a href="#">Ions score 45</a> )                                 |
| 397 - 407   | 635.78   | 1269.56   | 1270.71   | -1.16 | 0    | <b>K.AILLTDELQOK.Y</b> ( <a href="#">Ions score 19</a> )                                 |
| 397 - 407   | 636.24   | 1270.46   | 1270.71   | -0.25 | 0    | <b>K.AILLTDELQOK.Y</b> ( <a href="#">Ions score 41</a> )                                 |
| 397 - 407   | 636.70   | 1271.38   | 1270.71   | 0.66  | 0    | <b>K.AILLTDELQOK.Y</b> ( <a href="#">Ions score 13</a> )                                 |
| 397 - 407   | 636.71   | 1271.41   | 1270.71   | 0.70  | 0    | <b>K.AILLTDELQOK.Y</b> ( <a href="#">Ions score 15</a> )                                 |
| 397 - 407   | 639.28   | 1276.56   | 1277.76   | -1.21 | 0    | <b>K.AILLTDELQOK.Y</b> Heavy IsoLeu ( <a href="#">Ions score 43</a> )                    |
| 397 - 407   | 639.45   | 1276.89   | 1277.76   | -0.87 | 0    | <b>K.AILLTDELQOK.Y</b> Heavy IsoLeu ( <a href="#">Ions score 47</a> )                    |
| 397 - 407   | 639.87   | 1277.72   | 1277.76   | -0.04 | 0    | <b>K.AILLTDELQOK.Y</b> Heavy IsoLeu ( <a href="#">Ions score 6</a> )                     |

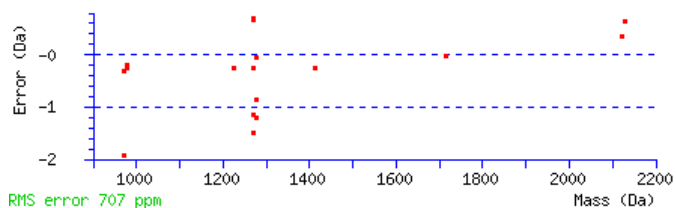

Mascot: <http://www.matrixscience.com/>

**MASCOT** SCIENCE Mascot Search Results

**Protein View**

Match to: **Plasmodium\_falciparum\_3D7|MAL10|PF10\_0155|Pf** Score: 4921

Annotation|**Plasmodium\_falciparum\_TIGR|(protein coding) enolase**

Found in search of \\Uk-ac-man-ssl\vol1\ls\Malaria\Niroshini\trapdata 2007\Trap data Jan2007\Niro 7-10 normal\_LCA\_1-E,2\_01\_6988.d\Analysis.mgf

Nominal mass (M<sub>r</sub>): 48647; Calculated pI value: 6.21

NCBI BLAST search of **Plasmodium\_falciparum\_3D7|MAL10|PF10\_0155|Pf** against nr

Unformatted [sequence string](#) for pasting into other applications

Variable modifications: Carbamidomethyl (C),Oxidation (M),Heavy IsoLeu

Cleavage by Trypsin: cuts C-term side of KR unless next residue is P

Sequence Coverage: 52%

Matched peptides shown in **Red**

1 MAHVITRINA REILDSRGNP TVEVDLETNL GIFRAAVPSG **ASTGIYEAL**  
 51 **LRDNDKSRYL** GKGVQKAIKN **INEIIPAKLI** GMNCTEQKKI **DNLVVEELDG**  
 101 **SKNEWGWSKS** KLGANAILAI SMAVCRAGAA ANKVSLYKYL **AQLAGKSDQ**  
 151 **MVLVPLCLNV** INGGSHAGNK **LSFQEFMIVP** VGAPSFKEAL **RYGAEVYHTL**  
 201 **KSEIKKYYGI** DATNVGDEGG FAPNILNANE ALDLLVTAIK SAGYEGKVKI  
 251 **AMDVAASEFY** NSENKTYDLD **FKTPNNDKSL** VKTGAQLVDL **YIDLVKKYP**  
 301 **VSIEDPFDQD** DWENYAKLTA AIGKDVQIVG **DDLVTNPTR** ITKALEKNAC  
 351 **NALLLKVNQI** GSITEAIEAC **LLSQKNNWCV** MVSHRSGETE DVFIALDVVA  
 401 LRTGQIKTGA PCRSENAKY NQLLRIEESL **GNNAVFAGEK** FRLQLN

Show predicted peptides also

Sort Peptides By  Residue Number  Increasing Mass  Decreasing Mass

| Start | End | Observed | Mr (expt) | Mr (calc) | Delta | Miss | Sequence                    |                                                                  |
|-------|-----|----------|-----------|-----------|-------|------|-----------------------------|------------------------------------------------------------------|
| 35    | 52  | 902.00   | 1801.99   | 1803.94   | -1.95 | 0    | R.AAVPSGASTGIYEALR.D        | (Ions score 80)                                                  |
| 35    | 52  | 902.38   | 1802.74   | 1803.94   | -1.20 | 0    | R.AAVPSGASTGIYEALR.D        | (Ions score 62)                                                  |
| 35    | 52  | 902.44   | 1802.87   | 1803.94   | -1.07 | 0    | R.AAVPSGASTGIYEALR.D        | (Ions score 85)                                                  |
| 35    | 52  | 902.46   | 1802.91   | 1803.94   | -1.03 | 0    | R.AAVPSGASTGIYEALR.D        | (Ions score 37)                                                  |
| 35    | 52  | 902.51   | 1803.00   | 1803.94   | -0.93 | 0    | R.AAVPSGASTGIYEALR.D        | (Ions score 8)                                                   |
| 35    | 52  | 902.92   | 1803.83   | 1803.94   | -0.11 | 0    | R.AAVPSGASTGIYEALR.D        | (Ions score 36)                                                  |
| 35    | 52  | 902.92   | 1803.83   | 1803.94   | -0.11 | 0    | R.AAVPSGASTGIYEALR.D        | (Ions score 31)                                                  |
| 35    | 52  | 902.93   | 1803.84   | 1803.94   | -0.10 | 0    | R.AAVPSGASTGIYEALR.D        | (Ions score 84)                                                  |
| 35    | 52  | 902.93   | 1803.85   | 1803.94   | -0.09 | 0    | R.AAVPSGASTGIYEALR.D        | (Ions score 43)                                                  |
| 35    | 52  | 902.97   | 1803.92   | 1803.94   | -0.01 | 0    | R.AAVPSGASTGIYEALR.D        | (Ions score 74)                                                  |
| 35    | 52  | 902.98   | 1803.94   | 1803.94   | 0.01  | 0    | R.AAVPSGASTGIYEALR.D        | (Ions score 64)                                                  |
| 35    | 52  | 905.84   | 1809.67   | 1810.99   | -1.32 | 0    | R.AAVPSGASTGIYEALR.D        | Heavy IsoLeu (Ions score 50)                                     |
| 35    | 52  | 905.92   | 1809.83   | 1810.99   | -1.16 | 0    | R.AAVPSGASTGIYEALR.D        | Heavy IsoLeu (Ions score 66)                                     |
| 35    | 52  | 604.31   | 1809.90   | 1810.99   | -1.09 | 0    | R.AAVPSGASTGIYEALR.D        | Heavy IsoLeu (Ions score 22)                                     |
| 35    | 52  | 905.99   | 1809.96   | 1810.99   | -1.02 | 0    | R.AAVPSGASTGIYEALR.D        | Heavy IsoLeu (Ions score 25)                                     |
| 35    | 52  | 906.23   | 1810.44   | 1810.99   | -0.55 | 0    | R.AAVPSGASTGIYEALR.D        | Heavy IsoLeu (Ions score 43)                                     |
| 35    | 52  | 906.38   | 1810.75   | 1810.99   | -0.24 | 0    | R.AAVPSGASTGIYEALR.D        | Heavy IsoLeu (Ions score 74)                                     |
| 35    | 52  | 906.40   | 1810.79   | 1810.99   | -0.20 | 0    | R.AAVPSGASTGIYEALR.D        | Heavy IsoLeu (Ions score 55)                                     |
| 35    | 52  | 906.40   | 1810.79   | 1810.99   | -0.20 | 0    | R.AAVPSGASTGIYEALR.D        | Heavy IsoLeu (Ions score 33)                                     |
| 35    | 52  | 906.42   | 1810.83   | 1810.99   | -0.16 | 0    | R.AAVPSGASTGIYEALR.D        | Heavy IsoLeu (Ions score 70)                                     |
| 35    | 52  | 906.43   | 1810.84   | 1810.99   | -0.15 | 0    | R.AAVPSGASTGIYEALR.D        | Heavy IsoLeu (Ions score 57)                                     |
| 35    | 52  | 906.45   | 1810.88   | 1810.99   | -0.11 | 0    | R.AAVPSGASTGIYEALR.D        | Heavy IsoLeu (Ions score 97)                                     |
| 35    | 52  | 906.47   | 1810.92   | 1810.99   | -0.06 | 0    | R.AAVPSGASTGIYEALR.D        | Heavy IsoLeu (Ions score 13)                                     |
| 35    | 52  | 906.89   | 1811.76   | 1810.99   | 0.77  | 0    | R.AAVPSGASTGIYEALR.D        | Heavy IsoLeu (Ions score 10)                                     |
| 35    | 52  | 906.92   | 1811.83   | 1810.99   | 0.84  | 0    | R.AAVPSGASTGIYEALR.D        | Heavy IsoLeu (Ions score 52)                                     |
| 35    | 52  | 906.97   | 1811.92   | 1810.99   | 0.93  | 0    | R.AAVPSGASTGIYEALR.D        | Heavy IsoLeu (Ions score 87)                                     |
| 70    | 78  | 506.12   | 1010.23   | 1010.58   | -0.35 | 0    | K.NINEIIPAK.L               | (Ions score 61)                                                  |
| 70    | 78  | 516.09   | 1030.16   | 1031.73   | -1.57 | 0    | K.NINEIIPAK.L               | 3 Heavy IsoLeu (Ions score 43)                                   |
| 79    | 88  | 597.02   | 1192.03   | 1192.56   | -0.52 | 0    | K.LIGMNCTEQK.K              | Carbamidomethyl (C) (Ions score 49)                              |
| 79    | 88  | 597.06   | 1192.11   | 1192.56   | -0.45 | 0    | K.LIGMNCTEQK.K              | Carbamidomethyl (C) (Ions score 46)                              |
| 79    | 88  | 597.13   | 1192.25   | 1192.56   | -0.31 | 0    | K.LIGMNCTEQK.K              | Carbamidomethyl (C) (Ions score 61)                              |
| 79    | 88  | 600.62   | 1199.23   | 1199.61   | -0.38 | 0    | K.LIGMNCTEQK.K              | Carbamidomethyl (C); Heavy IsoLeu (Ions score 26)                |
| 79    | 88  | 605.71   | 1209.41   | 1208.55   | 0.85  | 0    | K.LIGMNCTEQK.K              | Carbamidomethyl (C); Oxidation (M) (Ions score 51)               |
| 79    | 88  | 608.47   | 1214.92   | 1215.60   | -0.68 | 0    | K.LIGMNCTEQK.K              | Carbamidomethyl (C); Oxidation (M); Heavy IsoLeu (Ions score 49) |
| 79    | 89  | 636.22   | 1270.43   | 1270.68   | -0.26 | 1    | K.LIGMNCTEQK.I              | Heavy IsoLeu (Ions score 11)                                     |
| 89    | 102 | 795.89   | 1589.76   | 1589.80   | -0.04 | 1    | K.KIDNLMVEELDGSK.N          | (Ions score 80)                                                  |
| 89    | 102 | 799.34   | 1596.67   | 1596.85   | -0.18 | 1    | K.KIDNLMVEELDGSK.N          | Heavy IsoLeu (Ions score 95)                                     |
| 89    | 102 | 799.35   | 1596.68   | 1596.85   | -0.17 | 1    | K.KIDNLMVEELDGSK.N          | Heavy IsoLeu (Ions score 76)                                     |
| 89    | 102 | 799.82   | 1597.62   | 1596.85   | 0.77  | 1    | K.KIDNLMVEELDGSK.N          | Heavy IsoLeu (Ions score 103)                                    |
| 89    | 102 | 806.55   | 1611.08   | 1612.84   | -1.76 | 1    | K.KIDNLMVEELDGSK.N          | Oxidation (M); Heavy IsoLeu (Ions score 43)                      |
| 90    | 102 | 731.75   | 1461.49   | 1461.70   | -0.21 | 0    | K.IDNLMVEELDGSK.N           | (Ions score 74)                                                  |
| 90    | 102 | 731.76   | 1461.51   | 1461.70   | -0.19 | 0    | K.IDNLMVEELDGSK.N           | (Ions score 71)                                                  |
| 90    | 102 | 734.74   | 1467.46   | 1468.75   | -1.29 | 0    | K.IDNLMVEELDGSK.N           | Heavy IsoLeu (Ions score 68)                                     |
| 90    | 102 | 735.26   | 1468.50   | 1468.75   | -0.25 | 0    | K.IDNLMVEELDGSK.N           | Heavy IsoLeu (Ions score 76)                                     |
| 139   | 146 | 432.21   | 862.40    | 862.49    | -0.09 | 0    | K.YLAQLAGK.K                | (Ions score 41)                                                  |
| 148   | 170 | 1206.97  | 2411.93   | 2413.23   | -1.30 | 0    | K.SDQMVLVPLCLNVINGGSHAGNK.L | Carbamidomethyl (C); Heavy IsoLeu (Ions score 12)                |
| 171   | 187 | 948.47   | 1894.93   | 1895.99   | -1.05 | 0    | K.LSFQEFMIVPVGAPSFK.E       | (Ions score 45)                                                  |
| 171   | 187 | 948.97   | 1895.92   | 1895.99   | -0.07 | 0    | K.LSFQEFMIVPVGAPSFK.E       | (Ions score 31)                                                  |
| 171   | 187 | 948.97   | 1895.93   | 1895.99   | -0.06 | 0    | K.LSFQEFMIVPVGAPSFK.E       | (Ions score 53)                                                  |
| 171   | 187 | 948.98   | 1895.94   | 1895.99   | -0.04 | 0    | K.LSFQEFMIVPVGAPSFK.E       | (Ions score 43)                                                  |
| 171   | 187 | 948.99   | 1895.97   | 1895.99   | -0.01 | 0    | K.LSFQEFMIVPVGAPSFK.E       | (Ions score 52)                                                  |
| 171   | 187 | 949.01   | 1896.01   | 1895.99   | 0.02  | 0    | K.LSFQEFMIVPVGAPSFK.E       | (Ions score 54)                                                  |
| 171   | 187 | 949.46   | 1896.90   | 1895.99   | 0.92  | 0    | K.LSFQEFMIVPVGAPSFK.E       | (Ions score 35)                                                  |
| 171   | 187 | 952.45   | 1902.88   | 1903.04   | -0.16 | 0    | K.LSFQEFMIVPVGAPSFK.E       | Heavy IsoLeu (Ions score 40)                                     |
| 171   | 187 | 952.47   | 1902.93   | 1903.04   | -0.11 | 0    | K.LSFQEFMIVPVGAPSFK.E       | Heavy IsoLeu (Ions score 53)                                     |
| 171   | 187 | 952.49   | 1902.96   | 1903.04   | -0.08 | 0    | K.LSFQEFMIVPVGAPSFK.E       | Heavy IsoLeu (Ions score 46)                                     |
| 171   | 187 | 952.49   | 1902.97   | 1903.04   | -0.07 | 0    | K.LSFQEFMIVPVGAPSFK.E       | Heavy IsoLeu (Ions score 40)                                     |
| 171   | 187 | 952.50   | 1902.98   | 1903.04   | -0.06 | 0    | K.LSFQEFMIVPVGAPSFK.E       | Heavy IsoLeu (Ions score 33)                                     |
| 171   | 187 | 952.50   | 1902.99   | 1903.04   | -0.05 | 0    | K.LSFQEFMIVPVGAPSFK.E       | Heavy IsoLeu (Ions score 61)                                     |
| 171   | 187 | 953.02   | 1904.03   | 1903.04   | 0.99  | 0    | K.LSFQEFMIVPVGAPSFK.E       | Heavy IsoLeu (Ions score 56)                                     |
| 171   | 187 | 953.02   | 1904.04   | 1903.04   | 1.00  | 0    | K.LSFQEFMIVPVGAPSFK.E       | Heavy IsoLeu (Ions score 32)                                     |
| 171   | 187 | 956.70   | 1911.38   | 1911.98   | -0.60 | 0    | K.LSFQEFMIVPVGAPSFK.E       | Oxidation (M) (Ions score 15)                                    |
| 171   | 187 | 956.95   | 1911.89   | 1911.98   | -0.09 | 0    | K.LSFQEFMIVPVGAPSFK.E       | Oxidation (M) (Ions score 15)                                    |
| 171   | 187 | 956.98   | 1911.95   | 1911.98   | -0.03 | 0    | K.LSFQEFMIVPVGAPSFK.E       | Oxidation (M) (Ions score 26)                                    |
| 171   | 187 | 959.74   | 1917.46   | 1919.03   | -1.57 | 0    | K.LSFQEFMIVPVGAPSFK.E       | Oxidation (M); Heavy IsoLeu (Ions score 32)                      |
| 171   | 187 | 960.48   | 1918.94   | 1919.03   | -0.10 | 0    | K.LSFQEFMIVPVGAPSFK.E       | Oxidation (M); Heavy IsoLeu (Ions score 19)                      |
| 192   | 201 | 590.61   | 1179.20   | 1179.59   | -0.39 | 0    | R.YGAEVYHTLK.S              | (Ions score 36)                                                  |
| 192   | 201 | 590.61   | 1179.21   | 1179.59   | -0.38 | 0    | R.YGAEVYHTLK.S              | (Ions score 31)                                                  |
| 192   | 201 | 590.65   | 1179.28   | 1179.59   | -0.31 | 0    | R.YGAEVYHTLK.S              | (Ions score 63)                                                  |
| 192   | 201 | 590.65   | 1179.29   | 1179.59   | -0.30 | 0    | R.YGAEVYHTLK.S              | (Ions score 58)                                                  |
| 192   | 201 | 590.65   | 1179.29   | 1179.59   | -0.30 | 0    | R.YGAEVYHTLK.S              | (Ions score 49)                                                  |

|           |         |         |         |       |   |                          |                                                                       |
|-----------|---------|---------|---------|-------|---|--------------------------|-----------------------------------------------------------------------|
| 250 - 265 | 893.92  | 1785.83 | 1787.80 | -1.97 | 0 | K.IAMDVAASEFYNSENK.T     | ( <a href="#">Ions score 13</a> )                                     |
| 250 - 265 | 894.35  | 1786.69 | 1787.80 | -1.12 | 0 | K.IAMDVAASEFYNSENK.T     | ( <a href="#">Ions score 69</a> )                                     |
| 250 - 265 | 894.39  | 1786.76 | 1787.80 | -1.05 | 0 | K.IAMDVAASEFYNSENK.T     | ( <a href="#">Ions score 12</a> )                                     |
| 250 - 265 | 894.86  | 1787.70 | 1787.80 | -0.10 | 0 | K.IAMDVAASEFYNSENK.T     | ( <a href="#">Ions score 54</a> )                                     |
| 250 - 265 | 894.87  | 1787.72 | 1787.80 | -0.09 | 0 | K.IAMDVAASEFYNSENK.T     | ( <a href="#">Ions score 50</a> )                                     |
| 250 - 265 | 894.88  | 1787.74 | 1787.80 | -0.06 | 0 | K.IAMDVAASEFYNSENK.T     | ( <a href="#">Ions score 17</a> )                                     |
| 250 - 265 | 894.88  | 1787.76 | 1787.80 | -0.05 | 0 | K.IAMDVAASEFYNSENK.T     | ( <a href="#">Ions score 10</a> )                                     |
| 250 - 265 | 894.91  | 1787.80 | 1787.80 | -0.00 | 0 | K.IAMDVAASEFYNSENK.T     | ( <a href="#">Ions score 5</a> )                                      |
| 250 - 265 | 895.25  | 1788.48 | 1787.80 | 0.68  | 0 | K.IAMDVAASEFYNSENK.T     | ( <a href="#">Ions score 23</a> )                                     |
| 250 - 265 | 895.42  | 1788.82 | 1787.80 | 1.01  | 0 | K.IAMDVAASEFYNSENK.T     | ( <a href="#">Ions score 38</a> )                                     |
| 250 - 265 | 897.84  | 1793.66 | 1794.85 | -1.20 | 0 | K.IAMDVAASEFYNSENK.T     | Heavy IsoLeu ( <a href="#">Ions score 18</a> )                        |
| 250 - 265 | 898.36  | 1794.71 | 1794.85 | -0.14 | 0 | K.IAMDVAASEFYNSENK.T     | Heavy IsoLeu ( <a href="#">Ions score 35</a> )                        |
| 250 - 265 | 898.39  | 1794.77 | 1794.85 | -0.09 | 0 | K.IAMDVAASEFYNSENK.T     | Heavy IsoLeu ( <a href="#">Ions score 52</a> )                        |
| 250 - 265 | 898.42  | 1794.84 | 1794.85 | -0.02 | 0 | K.IAMDVAASEFYNSENK.T     | Heavy IsoLeu ( <a href="#">Ions score 15</a> )                        |
| 250 - 265 | 898.47  | 1794.92 | 1794.85 | 0.07  | 0 | K.IAMDVAASEFYNSENK.T     | Heavy IsoLeu ( <a href="#">Ions score 6</a> )                         |
| 250 - 265 | 902.85  | 1803.69 | 1803.80 | -0.11 | 0 | K.IAMDVAASEFYNSENK.T     | Oxidation (M) ( <a href="#">Ions score 76</a> )                       |
| 250 - 265 | 902.86  | 1803.71 | 1803.80 | -0.09 | 0 | K.IAMDVAASEFYNSENK.T     | Oxidation (M) ( <a href="#">Ions score 61</a> )                       |
| 250 - 265 | 906.00  | 1809.98 | 1810.85 | -0.87 | 0 | K.IAMDVAASEFYNSENK.T     | Oxidation (M); Heavy IsoLeu ( <a href="#">Ions score 67</a> )         |
| 250 - 265 | 906.32  | 1810.63 | 1810.85 | -0.22 | 0 | K.IAMDVAASEFYNSENK.T     | Oxidation (M); Heavy IsoLeu ( <a href="#">Ions score 35</a> )         |
| 266 - 272 | 451.19  | 900.36  | 900.42  | -0.06 | 0 | K.TYDLDFK.T              | ( <a href="#">Ions score 40</a> )                                     |
| 283 - 296 | 774.32  | 1546.63 | 1546.86 | -0.23 | 0 | K.TGAQLVDLYIDLVK.K       | ( <a href="#">Ions score 56</a> )                                     |
| 283 - 296 | 774.34  | 1546.66 | 1546.86 | -0.20 | 0 | K.TGAQLVDLYIDLVK.K       | ( <a href="#">Ions score 72</a> )                                     |
| 283 - 296 | 774.36  | 1546.70 | 1546.86 | -0.16 | 0 | K.TGAQLVDLYIDLVK.K       | ( <a href="#">Ions score 71</a> )                                     |
| 283 - 296 | 774.36  | 1546.70 | 1546.86 | -0.16 | 0 | K.TGAQLVDLYIDLVK.K       | ( <a href="#">Ions score 78</a> )                                     |
| 283 - 296 | 774.36  | 1546.71 | 1546.86 | -0.16 | 0 | K.TGAQLVDLYIDLVK.K       | ( <a href="#">Ions score 71</a> )                                     |
| 283 - 296 | 774.39  | 1546.77 | 1546.86 | -0.09 | 0 | K.TGAQLVDLYIDLVK.K       | ( <a href="#">Ions score 74</a> )                                     |
| 283 - 296 | 774.45  | 1546.89 | 1546.86 | 0.02  | 0 | K.TGAQLVDLYIDLVK.K       | ( <a href="#">Ions score 72</a> )                                     |
| 283 - 296 | 774.87  | 1547.73 | 1546.86 | 0.87  | 0 | K.TGAQLVDLYIDLVK.K       | ( <a href="#">Ions score 72</a> )                                     |
| 283 - 296 | 777.36  | 1552.71 | 1553.91 | -1.20 | 0 | K.TGAQLVDLYIDLVK.K       | Heavy IsoLeu ( <a href="#">Ions score 56</a> )                        |
| 283 - 296 | 777.77  | 1553.54 | 1553.91 | -0.38 | 0 | K.TGAQLVDLYIDLVK.K       | Heavy IsoLeu ( <a href="#">Ions score 59</a> )                        |
| 283 - 296 | 777.83  | 1553.65 | 1553.91 | -0.26 | 0 | K.TGAQLVDLYIDLVK.K       | Heavy IsoLeu ( <a href="#">Ions score 57</a> )                        |
| 283 - 296 | 777.84  | 1553.66 | 1553.91 | -0.26 | 0 | K.TGAQLVDLYIDLVK.K       | Heavy IsoLeu ( <a href="#">Ions score 65</a> )                        |
| 283 - 296 | 777.86  | 1553.71 | 1553.91 | -0.20 | 0 | K.TGAQLVDLYIDLVK.K       | Heavy IsoLeu ( <a href="#">Ions score 56</a> )                        |
| 283 - 296 | 777.88  | 1553.75 | 1553.91 | -0.16 | 0 | K.TGAQLVDLYIDLVK.K       | Heavy IsoLeu ( <a href="#">Ions score 67</a> )                        |
| 283 - 296 | 777.90  | 1553.79 | 1553.91 | -0.13 | 0 | K.TGAQLVDLYIDLVK.K       | Heavy IsoLeu ( <a href="#">Ions score 59</a> )                        |
| 283 - 296 | 777.93  | 1553.85 | 1553.91 | -0.06 | 0 | K.TGAQLVDLYIDLVK.K       | Heavy IsoLeu ( <a href="#">Ions score 68</a> )                        |
| 283 - 296 | 777.96  | 1553.91 | 1553.91 | -0.01 | 0 | K.TGAQLVDLYIDLVK.K       | Heavy IsoLeu ( <a href="#">Ions score 59</a> )                        |
| 297 - 317 | 857.96  | 2570.86 | 2571.18 | -0.32 | 1 | K.KYPIVSIEDPFQDDWENYAK.L | ( <a href="#">Ions score 107</a> )                                    |
| 297 - 317 | 1286.49 | 2570.97 | 2571.18 | -0.22 | 1 | K.KYPIVSIEDPFQDDWENYAK.L | ( <a href="#">Ions score 58</a> )                                     |
| 297 - 317 | 1286.52 | 2571.02 | 2571.18 | -0.16 | 1 | K.KYPIVSIEDPFQDDWENYAK.L | ( <a href="#">Ions score 58</a> )                                     |
| 297 - 317 | 858.04  | 2571.11 | 2571.18 | -0.07 | 1 | K.KYPIVSIEDPFQDDWENYAK.L | ( <a href="#">Ions score 70</a> )                                     |
| 297 - 317 | 858.13  | 2571.36 | 2571.18 | 0.18  | 1 | K.KYPIVSIEDPFQDDWENYAK.L | ( <a href="#">Ions score 65</a> )                                     |
| 297 - 317 | 1286.99 | 2571.96 | 2571.18 | 0.78  | 1 | K.KYPIVSIEDPFQDDWENYAK.L | ( <a href="#">Ions score 69</a> )                                     |
| 297 - 317 | 858.70  | 2573.06 | 2571.18 | 1.88  | 1 | K.KYPIVSIEDPFQDDWENYAK.L | ( <a href="#">Ions score 113</a> )                                    |
| 297 - 317 | 1293.48 | 2584.95 | 2585.28 | -0.33 | 1 | K.KYPIVSIEDPFQDDWENYAK.L | 2 Heavy IsoLeu ( <a href="#">Ions score 36</a> )                      |
| 297 - 317 | 1293.57 | 2585.13 | 2585.28 | -0.15 | 1 | K.KYPIVSIEDPFQDDWENYAK.L | 2 Heavy IsoLeu ( <a href="#">Ions score 43</a> )                      |
| 297 - 317 | 862.74  | 2585.20 | 2585.28 | -0.08 | 1 | K.KYPIVSIEDPFQDDWENYAK.L | 2 Heavy IsoLeu ( <a href="#">Ions score 58</a> )                      |
| 297 - 317 | 862.75  | 2585.22 | 2585.28 | -0.07 | 1 | K.KYPIVSIEDPFQDDWENYAK.L | 2 Heavy IsoLeu ( <a href="#">Ions score 6</a> )                       |
| 297 - 317 | 863.02  | 2586.04 | 2585.28 | 0.76  | 1 | K.KYPIVSIEDPFQDDWENYAK.L | 2 Heavy IsoLeu ( <a href="#">Ions score 28</a> )                      |
| 298 - 317 | 1222.42 | 2442.84 | 2443.09 | -0.25 | 0 | K.YPIVSIEDPFQDDWENYAK.L  | ( <a href="#">Ions score 29</a> )                                     |
| 298 - 317 | 1222.45 | 2442.89 | 2443.09 | -0.20 | 0 | K.YPIVSIEDPFQDDWENYAK.L  | ( <a href="#">Ions score 47</a> )                                     |
| 298 - 317 | 1222.45 | 2442.90 | 2443.09 | -0.19 | 0 | K.YPIVSIEDPFQDDWENYAK.L  | ( <a href="#">Ions score 48</a> )                                     |
| 298 - 317 | 1222.87 | 2443.73 | 2443.09 | 0.64  | 0 | K.YPIVSIEDPFQDDWENYAK.L  | ( <a href="#">Ions score 52</a> )                                     |
| 298 - 317 | 1223.43 | 2444.84 | 2443.09 | 1.75  | 0 | K.YPIVSIEDPFQDDWENYAK.L  | ( <a href="#">Ions score 43</a> )                                     |
| 298 - 317 | 1229.00 | 2455.98 | 2457.19 | -1.21 | 0 | K.YPIVSIEDPFQDDWENYAK.L  | 2 Heavy IsoLeu ( <a href="#">Ions score 73</a> )                      |
| 298 - 317 | 1229.45 | 2456.89 | 2457.19 | -0.30 | 0 | K.YPIVSIEDPFQDDWENYAK.L  | 2 Heavy IsoLeu ( <a href="#">Ions score 39</a> )                      |
| 298 - 317 | 1229.46 | 2456.90 | 2457.19 | -0.29 | 0 | K.YPIVSIEDPFQDDWENYAK.L  | 2 Heavy IsoLeu ( <a href="#">Ions score 45</a> )                      |
| 325 - 340 | 877.17  | 1752.33 | 1753.92 | -1.59 | 0 | K.DVQIVGDDLLVTNPTR.I     | ( <a href="#">Ions score 16</a> )                                     |
| 325 - 340 | 877.45  | 1752.88 | 1753.92 | -1.05 | 0 | K.DVQIVGDDLLVTNPTR.I     | ( <a href="#">Ions score 40</a> )                                     |
| 325 - 340 | 877.88  | 1753.75 | 1753.92 | -0.17 | 0 | K.DVQIVGDDLLVTNPTR.I     | ( <a href="#">Ions score 61</a> )                                     |
| 325 - 340 | 877.92  | 1753.83 | 1753.92 | -0.10 | 0 | K.DVQIVGDDLLVTNPTR.I     | ( <a href="#">Ions score 87</a> )                                     |
| 325 - 340 | 877.93  | 1753.84 | 1753.92 | -0.08 | 0 | K.DVQIVGDDLLVTNPTR.I     | ( <a href="#">Ions score 77</a> )                                     |
| 325 - 340 | 877.93  | 1753.84 | 1753.92 | -0.08 | 0 | K.DVQIVGDDLLVTNPTR.I     | ( <a href="#">Ions score 88</a> )                                     |
| 325 - 340 | 877.94  | 1753.86 | 1753.92 | -0.06 | 0 | K.DVQIVGDDLLVTNPTR.I     | ( <a href="#">Ions score 49</a> )                                     |
| 325 - 340 | 877.98  | 1753.95 | 1753.92 | 0.03  | 0 | K.DVQIVGDDLLVTNPTR.I     | ( <a href="#">Ions score 48</a> )                                     |
| 325 - 340 | 878.39  | 1754.76 | 1753.92 | 0.84  | 0 | K.DVQIVGDDLLVTNPTR.I     | ( <a href="#">Ions score 38</a> )                                     |
| 325 - 340 | 880.85  | 1759.69 | 1760.97 | -1.28 | 0 | K.DVQIVGDDLLVTNPTR.I     | Heavy IsoLeu ( <a href="#">Ions score 16</a> )                        |
| 325 - 340 | 880.91  | 1759.81 | 1760.97 | -1.16 | 0 | K.DVQIVGDDLLVTNPTR.I     | Heavy IsoLeu ( <a href="#">Ions score 80</a> )                        |
| 325 - 340 | 881.40  | 1760.79 | 1760.97 | -0.18 | 0 | K.DVQIVGDDLLVTNPTR.I     | Heavy IsoLeu ( <a href="#">Ions score 62</a> )                        |
| 325 - 340 | 881.41  | 1760.82 | 1760.97 | -0.16 | 0 | K.DVQIVGDDLLVTNPTR.I     | Heavy IsoLeu ( <a href="#">Ions score 57</a> )                        |
| 325 - 340 | 881.42  | 1760.83 | 1760.97 | -0.14 | 0 | K.DVQIVGDDLLVTNPTR.I     | Heavy IsoLeu ( <a href="#">Ions score 59</a> )                        |
| 325 - 340 | 881.82  | 1761.62 | 1760.97 | 0.65  | 0 | K.DVQIVGDDLLVTNPTR.I     | Heavy IsoLeu ( <a href="#">Ions score 15</a> )                        |
| 325 - 340 | 881.82  | 1761.63 | 1760.97 | 0.66  | 0 | K.DVQIVGDDLLVTNPTR.I     | Heavy IsoLeu ( <a href="#">Ions score 27</a> )                        |
| 325 - 340 | 881.86  | 1761.71 | 1760.97 | 0.74  | 0 | K.DVQIVGDDLLVTNPTR.I     | Heavy IsoLeu ( <a href="#">Ions score 29</a> )                        |
| 325 - 340 | 881.91  | 1761.82 | 1760.97 | 0.84  | 0 | K.DVQIVGDDLLVTNPTR.I     | Heavy IsoLeu ( <a href="#">Ions score 92</a> )                        |
| 325 - 340 | 881.92  | 1761.83 | 1760.97 | 0.86  | 0 | K.DVQIVGDDLLVTNPTR.I     | Heavy IsoLeu ( <a href="#">Ions score 2</a> )                         |
| 348 - 356 | 508.71  | 1015.41 | 1015.55 | -0.14 | 0 | K.NACNALLK.V             | Carbamidomethyl (C) ( <a href="#">Ions score 42</a> )                 |
| 357 - 375 | 1036.65 | 2071.29 | 2073.08 | -1.79 | 0 | K.VNIGSITEAIEACLLSQ.N    | Carbamidomethyl (C) ( <a href="#">Ions score 40</a> )                 |
| 357 - 375 | 1036.98 | 2071.95 | 2073.08 | -1.13 | 0 | K.VNIGSITEAIEACLLSQ.N    | Carbamidomethyl (C) ( <a href="#">Ions score 62</a> )                 |
| 357 - 375 | 1037.44 | 2072.86 | 2073.08 | -0.22 | 0 | K.VNIGSITEAIEACLLSQ.N    | Carbamidomethyl (C) ( <a href="#">Ions score 56</a> )                 |
| 357 - 375 | 691.96  | 2072.87 | 2073.08 | -0.21 | 0 | K.VNIGSITEAIEACLLSQ.N    | Carbamidomethyl (C) ( <a href="#">Ions score 32</a> )                 |
| 357 - 375 | 1037.45 | 2072.89 | 2073.08 | -0.19 | 0 | K.VNIGSITEAIEACLLSQ.N    | Carbamidomethyl (C) ( <a href="#">Ions score 47</a> )                 |
| 357 - 375 | 1037.46 | 2072.91 | 2073.08 | -0.17 | 0 | K.VNIGSITEAIEACLLSQ.N    | Carbamidomethyl (C) ( <a href="#">Ions score 31</a> )                 |
| 357 - 375 | 1037.48 | 2072.95 | 2073.08 | -0.13 | 0 | K.VNIGSITEAIEACLLSQ.N    | Carbamidomethyl (C) ( <a href="#">Ions score 33</a> )                 |
| 357 - 375 | 691.99  | 2072.95 | 2073.08 | -0.13 | 0 | K.VNIGSITEAIEACLLSQ.N    | Carbamidomethyl (C) ( <a href="#">Ions score 63</a> )                 |
| 357 - 375 | 1037.49 | 2072.96 | 2073.08 | -0.12 | 0 | K.VNIGSITEAIEACLLSQ.N    | Carbamidomethyl (C) ( <a href="#">Ions score 77</a> )                 |
| 357 - 375 | 1037.49 | 2072.96 | 2073.08 | -0.12 | 0 | K.VNIGSITEAIEACLLSQ.N    | Carbamidomethyl (C) ( <a href="#">Ions score 48</a> )                 |
| 357 - 375 | 1037.49 | 2072.97 | 2073.08 | -0.11 | 0 | K.VNIGSITEAIEACLLSQ.N    | Carbamidomethyl (C) ( <a href="#">Ions score 62</a> )                 |
| 357 - 375 | 1037.49 | 2072.98 | 2073.08 | -0.10 | 0 | K.VNIGSITEAIEACLLSQ.N    | Carbamidomethyl (C) ( <a href="#">Ions score 64</a> )                 |
| 357 - 375 | 692.00  | 2072.98 | 2073.08 | -0.10 | 0 | K.VNIGSITEAIEACLLSQ.N    | Carbamidomethyl (C) ( <a href="#">Ions score 50</a> )                 |
| 357 - 375 | 1037.50 | 2072.99 | 2073.08 | -0.08 | 0 | K.VNIGSITEAIEACLLSQ.N    | Carbamidomethyl (C) ( <a href="#">Ions score 51</a> )                 |
| 357 - 375 | 692.01  | 2073.02 | 2073.08 | -0.06 | 0 | K.VNIGSITEAIEACLLSQ.N    | Carbamidomethyl (C) ( <a href="#">Ions score 52</a> )                 |
| 357 - 375 | 692.02  | 2073.04 | 2073.08 | -0.04 | 0 | K.VNIGSITEAIEACLLSQ.N    | Carbamidomethyl (C) ( <a href="#">Ions score 27</a> )                 |
| 357 - 375 | 1037.54 | 2073.06 | 2073.08 | -0.02 | 0 | K.VNIGSITEAIEACLLSQ.N    | Carbamidomethyl (C) ( <a href="#">Ions score 68</a> )                 |
| 357 - 375 | 1037.59 | 2073.17 | 2073.08 | 0.09  | 0 | K.VNIGSITEAIEACLLSQ.N    | Carbamidomethyl (C) ( <a href="#">Ions score 10</a> )                 |
| 357 - 375 | 692.17  | 2073.49 | 2073.08 | 0.42  | 0 | K.VNIGSITEAIEACLLSQ.N    | Carbamidomethyl (C) ( <a href="#">Ions score 56</a> )                 |
| 357 - 375 | 1044.53 | 2087.05 | 2087.18 | -0.13 | 0 | K.VNIGSITEAIEACLLSQ.N    | Carbamidomethyl (C); 2 Heavy IsoLeu ( <a href="#">Ions score 9</a> )  |
| 357 - 375 | 1047.31 | 2092.60 | 2094.23 | -1.63 | 0 | K.VNIGSITEAIEACLLSQ.N    | Carbamidomethyl (C); 3 Heavy IsoLeu ( <a href="#">Ions score 11</a> ) |
| 357 - 375 | 1047.48 | 2092.94 | 2094.23 | -1.29 | 0 | K.VNIGSITEAIEACLLSQ.N    | Carbamidomethyl (C); 3 Heavy IsoLeu ( <a href="#">Ions score 72</a> ) |
| 357 - 375 | 1047.52 | 2093.02 | 2094.23 | -1.21 | 0 | K.VNIGSITEAIEACLLSQ.N    | Carbamidomethyl (C); 3 Heavy IsoLeu ( <a href="#">Ions score 46</a> ) |
| 357 - 375 | 1047.54 | 2093.06 | 2094.23 | -1.17 | 0 | K.VNIGSITEAIEACLLSQ.N    | Carbamidomethyl (C); 3 Heavy IsoLeu ( <a href="#">Ions score 29</a> ) |
| 357 - 375 | 698.91  | 2093.72 | 2094.23 | -0.51 | 0 | K.VNIGSITEAIEACLLSQ.N    | Carbamidomethyl (C); 3 Heavy IsoLeu ( <a href="#">Ions score 13</a> ) |
| 357 - 375 | 698.95  | 2093.84 | 2094.23 | -0.39 | 0 | K.VNIGSITEAIEACLLSQ.N    | Carbamidomethyl (C); 3 Heavy IsoLeu ( <a href="#">Ions score 20</a> ) |
| 357 - 375 | 1047.97 | 2093.93 | 2094.23 | -0.30 | 0 | K.VNIGSITEAIEACLLSQ.N    | Carbamidomethyl (C); 3 Heavy IsoLeu ( <a href="#">Ions score 72</a> ) |
| 357 - 375 | 698.99  | 2093.94 | 2094.23 | -0.29 | 0 | K.VNIGSITEAIEACLLSQ.N    | Carbamidomethyl (C); 3 Heavy IsoLeu ( <a href="#">Ions score 32</a> ) |
| 357 - 375 | 1047.98 | 2093.95 | 2094.23 | -0.29 | 0 | K.VNIGSITEAIEACLLSQ.N    | Carbamidomethyl (C); 3 Heavy IsoLe                                    |

|           |         |         |         |       |   |                         |                                     |                                    |
|-----------|---------|---------|---------|-------|---|-------------------------|-------------------------------------|------------------------------------|
| 357 - 375 | 1048.01 | 2094.00 | 2094.23 | -0.23 | 0 | K.VNQIGSITEAIEACLLSQK.N | Carbamidomethyl (C); 3 Heavy IsoLeu | ( <a href="#">Ions score 61</a> )  |
| 357 - 375 | 699.01  | 2094.01 | 2094.23 | -0.22 | 0 | K.VNQIGSITEAIEACLLSQK.N | Carbamidomethyl (C); 3 Heavy IsoLeu | ( <a href="#">Ions score 27</a> )  |
| 357 - 375 | 1048.04 | 2094.06 | 2094.23 | -0.17 | 0 | K.VNQIGSITEAIEACLLSQK.N | Carbamidomethyl (C); 3 Heavy IsoLeu | ( <a href="#">Ions score 48</a> )  |
| 357 - 375 | 1048.04 | 2094.07 | 2094.23 | -0.16 | 0 | K.VNQIGSITEAIEACLLSQK.N | Carbamidomethyl (C); 3 Heavy IsoLeu | ( <a href="#">Ions score 38</a> )  |
| 357 - 375 | 699.04  | 2094.11 | 2094.23 | -0.12 | 0 | K.VNQIGSITEAIEACLLSQK.N | Carbamidomethyl (C); 3 Heavy IsoLeu | ( <a href="#">Ions score 12</a> )  |
| 357 - 375 | 1048.10 | 2094.19 | 2094.23 | -0.04 | 0 | K.VNQIGSITEAIEACLLSQK.N | Carbamidomethyl (C); 3 Heavy IsoLeu | ( <a href="#">Ions score 21</a> )  |
| 357 - 375 | 1048.31 | 2094.60 | 2094.23 | 0.37  | 0 | K.VNQIGSITEAIEACLLSQK.N | Carbamidomethyl (C); 3 Heavy IsoLeu | ( <a href="#">Ions score 80</a> )  |
| 357 - 375 | 1048.93 | 2095.85 | 2094.23 | 1.62  | 0 | K.VNQIGSITEAIEACLLSQK.N | Carbamidomethyl (C); 3 Heavy IsoLeu | ( <a href="#">Ions score 50</a> )  |
| 357 - 375 | 1049.02 | 2096.02 | 2094.23 | 1.79  | 0 | K.VNQIGSITEAIEACLLSQK.N | Carbamidomethyl (C); 3 Heavy IsoLeu | ( <a href="#">Ions score 68</a> )  |
| 376 - 385 | 600.07  | 1198.13 | 1198.57 | -0.44 | 0 | K.NNWGVMVSHR.S          | ( <a href="#">Ions score 22</a> )   |                                    |
| 376 - 385 | 600.12  | 1198.23 | 1198.57 | -0.34 | 0 | K.NNWGVMVSHR.S          | ( <a href="#">Ions score 46</a> )   |                                    |
| 376 - 385 | 608.22  | 1214.42 | 1214.56 | -0.14 | 0 | K.NNWGVMVSHR.S          | Oxidation (M)                       | ( <a href="#">Ions score 17</a> )  |
| 426 - 440 | 789.24  | 1576.46 | 1576.77 | -0.32 | 0 | R.IEESLGNNAVFAGEK.F     | ( <a href="#">Ions score 55</a> )   |                                    |
| 426 - 440 | 789.28  | 1576.55 | 1576.77 | -0.22 | 0 | R.IEESLGNNAVFAGEK.F     | ( <a href="#">Ions score 66</a> )   |                                    |
| 426 - 440 | 789.28  | 1576.56 | 1576.77 | -0.22 | 0 | R.IEESLGNNAVFAGEK.F     | ( <a href="#">Ions score 95</a> )   |                                    |
| 426 - 440 | 789.29  | 1576.57 | 1576.77 | -0.20 | 0 | R.IEESLGNNAVFAGEK.F     | ( <a href="#">Ions score 71</a> )   |                                    |
| 426 - 440 | 789.33  | 1576.64 | 1576.77 | -0.14 | 0 | R.IEESLGNNAVFAGEK.F     | ( <a href="#">Ions score 102</a> )  |                                    |
| 426 - 440 | 789.35  | 1576.68 | 1576.77 | -0.09 | 0 | R.IEESLGNNAVFAGEK.F     | ( <a href="#">Ions score 64</a> )   |                                    |
| 426 - 440 | 789.40  | 1576.78 | 1576.77 | 0.01  | 0 | R.IEESLGNNAVFAGEK.F     | ( <a href="#">Ions score 81</a> )   |                                    |
| 426 - 440 | 789.75  | 1577.50 | 1576.77 | 0.72  | 0 | R.IEESLGNNAVFAGEK.F     | ( <a href="#">Ions score 70</a> )   |                                    |
| 426 - 440 | 792.18  | 1582.34 | 1583.82 | -1.48 | 0 | R.IEESLGNNAVFAGEK.F     | Heavy IsoLeu                        | ( <a href="#">Ions score 80</a> )  |
| 426 - 440 | 792.74  | 1583.46 | 1583.82 | -0.37 | 0 | R.IEESLGNNAVFAGEK.F     | Heavy IsoLeu                        | ( <a href="#">Ions score 46</a> )  |
| 426 - 440 | 792.74  | 1583.47 | 1583.82 | -0.35 | 0 | R.IEESLGNNAVFAGEK.F     | Heavy IsoLeu                        | ( <a href="#">Ions score 66</a> )  |
| 426 - 440 | 792.83  | 1583.64 | 1583.82 | -0.19 | 0 | R.IEESLGNNAVFAGEK.F     | Heavy IsoLeu                        | ( <a href="#">Ions score 101</a> ) |
| 426 - 440 | 792.83  | 1583.64 | 1583.82 | -0.18 | 0 | R.IEESLGNNAVFAGEK.F     | Heavy IsoLeu                        | ( <a href="#">Ions score 83</a> )  |

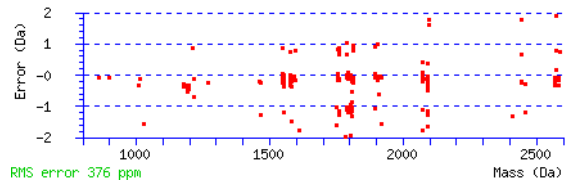

Mascot: <http://www.matrixscience.com/>
