# Supplementary material
Source: PubMed Central journal article supplement (PMC2632839)
Supplement: NIHMS3654-supplement-supp5.pdf [file NIHMS3654-supplement-supp5.pdf]

Supporting information  
Appendix 5:

MS sequence confirmation data for *P. falciparum* SHMT peptide AILLTDELQK (unlabelled)

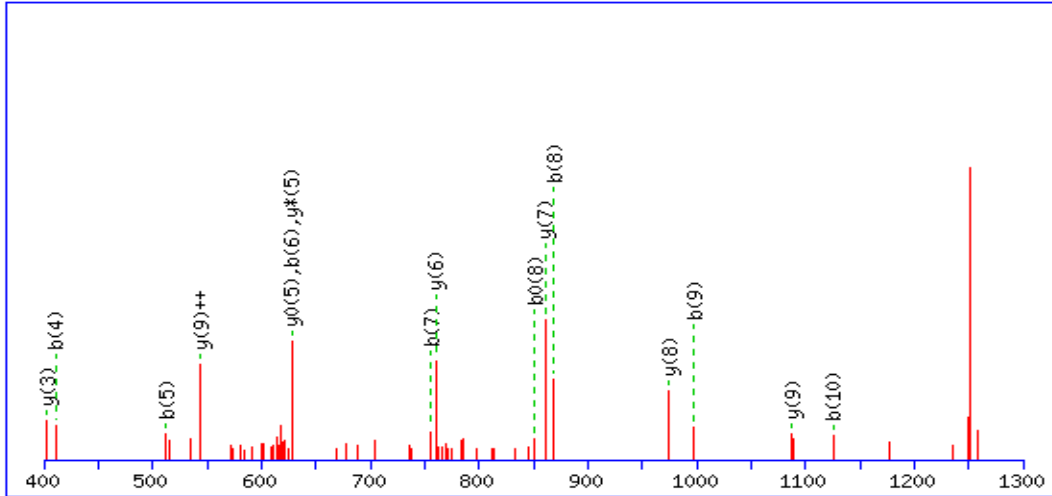

**Monoisotopic mass of neutral peptide Mr(calc):** 1270.71

**Ions Score:** 45 **Expect:** 0.012

**Matches (Bold Red):** 16/88 fragment ions using 24 most intense peaks

| #  | b              | b <sup>++</sup> | b <sup>+</sup> | b <sup>+++</sup> | b <sup>0</sup> | b <sup>0++</sup> | Seq. | y              | y <sup>++</sup> | y <sup>+</sup> | y <sup>+++</sup> | y <sup>0</sup> | y <sup>0++</sup> | #  |
|----|----------------|-----------------|----------------|------------------|----------------|------------------|------|----------------|-----------------|----------------|------------------|----------------|------------------|----|
| 1  | 72.04          | 36.53           |                |                  |                |                  | A    |                |                 |                |                  |                |                  | 11 |
| 2  | 185.13         | 93.07           |                |                  |                |                  | I    | 1200.68        | 600.85          | 1183.66        | 592.33           | 1182.67        | 591.84           | 10 |
| 3  | 298.21         | 149.61          |                |                  |                |                  | L    | <b>1087.60</b> | <b>544.30</b>   | 1070.57        | 535.79           | 1069.59        | 535.30           | 9  |
| 4  | <b>411.30</b>  | 206.15          |                |                  |                |                  | L    | <b>974.52</b>  | 487.76          | 957.49         | 479.25           | 956.50         | 478.76           | 8  |
| 5  | <b>512.34</b>  | 256.68          |                |                  | 494.33         | 247.67           | T    | <b>861.43</b>  | 431.22          | 844.40         | 422.71           | 843.42         | 422.21           | 7  |
| 6  | <b>627.37</b>  | 314.19          |                |                  | 609.36         | 305.18           | D    | <b>760.38</b>  | 380.70          | 743.36         | 372.18           | 742.37         | 371.69           | 6  |
| 7  | <b>756.41</b>  | 378.71          |                |                  | 738.40         | 369.71           | E    | 645.36         | 323.18          | <b>628.33</b>  | 314.67           | <b>627.35</b>  | 314.18           | 5  |
| 8  | <b>869.50</b>  | 435.25          |                |                  | <b>851.49</b>  | 426.25           | L    | 516.31         | 258.66          | 499.29         | 250.15           |                |                  | 4  |
| 9  | <b>997.56</b>  | 499.28          | 980.53         | 490.77           | 979.55         | 490.28           | Q    | <b>403.23</b>  | 202.12          | 386.20         | 193.61           |                |                  | 3  |
| 10 | <b>1125.61</b> | 563.31          | 1108.59        | 554.80           | 1107.60        | 554.31           | Q    | 275.17         | 138.09          | 258.14         | 129.58           |                |                  | 2  |
| 11 |                |                 |                |                  |                |                  | K    | 147.11         | 74.06           | 130.09         | 65.55            |                |                  | 1  |

Appendix 5a

MS sequence confirmation data for *P. falciparum* SHMT peptide AILLTDELQK (labelled) showing expected 7 Da mass increase in b ion series.

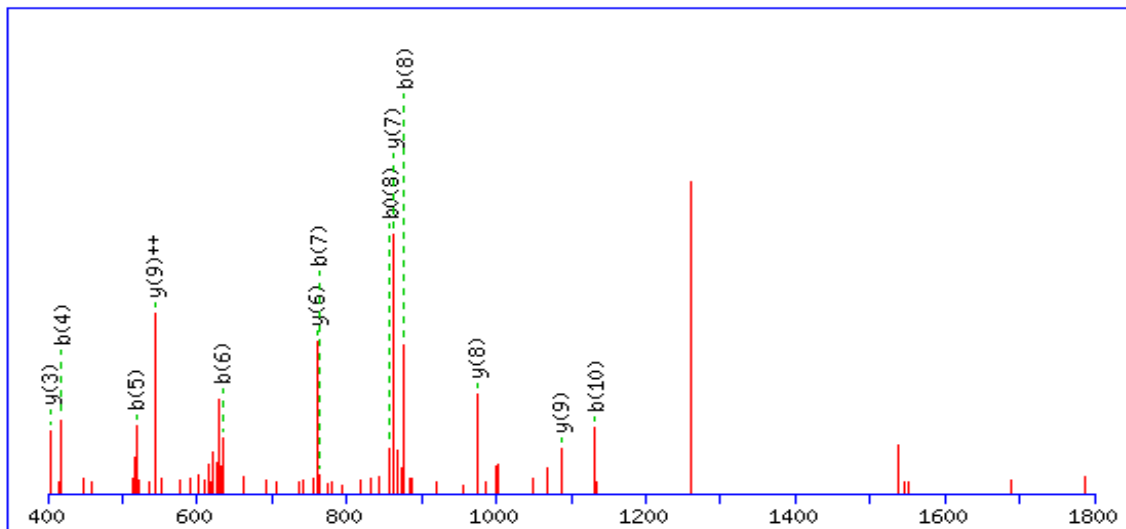

**Monoisotopic mass of neutral peptide Mr(calc):** 1277.76

**Variable modifications:**

**I2** : Heavy IsoLeu

**Ions Score:** 47 **Expect:** 0.0083

**Matches (Bold Red):** 13/88 fragment ions using 18 most intense peaks

| #  | b              | b <sup>++</sup> | b <sup>*</sup> | b <sup>+++</sup> | b <sup>0</sup> | b <sup>0++</sup> | Seq. | y              | y <sup>++</sup> | y <sup>*</sup> | y <sup>+++</sup> | y <sup>0</sup> | y <sup>0++</sup> | #  |
|----|----------------|-----------------|----------------|------------------|----------------|------------------|------|----------------|-----------------|----------------|------------------|----------------|------------------|----|
| 1  | 72.04          | 36.53           |                |                  |                |                  | A    |                |                 |                |                  |                |                  | 11 |
| 2  | 192.18         | 96.59           |                |                  |                |                  | I    | 1207.73        | 604.37          | 1190.71        | 595.86           | 1189.72        | 595.37           | 10 |
| 3  | 305.26         | 153.14          |                |                  |                |                  | L    | <b>1087.60</b> | <b>544.30</b>   | 1070.57        | 535.79           | 1069.59        | 535.30           | 9  |
| 4  | <b>418.35</b>  | 209.68          |                |                  |                |                  | L    | <b>974.52</b>  | 487.76          | 957.49         | 479.25           | 956.50         | 478.76           | 8  |
| 5  | <b>519.40</b>  | 260.20          |                |                  | 501.38         | 251.20           | T    | <b>861.43</b>  | 431.22          | 844.40         | 422.71           | 843.42         | 422.21           | 7  |
| 6  | <b>634.42</b>  | 317.71          |                |                  | 616.41         | 308.71           | D    | <b>760.38</b>  | 380.70          | 743.36         | 372.18           | 742.37         | 371.69           | 6  |
| 7  | <b>763.46</b>  | 382.24          |                |                  | 745.45         | 373.23           | E    | 645.36         | 323.18          | 628.33         | 314.67           | 627.35         | 314.18           | 5  |
| 8  | <b>876.55</b>  | 438.78          |                |                  | <b>858.54</b>  | 429.77           | L    | 516.31         | 258.66          | 499.29         | 250.15           |                |                  | 4  |
| 9  | 1004.61        | 502.81          | 987.58         | 494.29           | 986.60         | 493.80           | Q    | <b>403.23</b>  | 202.12          | 386.20         | 193.61           |                |                  | 3  |
| 10 | <b>1132.67</b> | 566.84          | 1115.64        | 558.32           | 1114.66        | 557.83           | Q    | 275.17         | 138.09          | 258.14         | 129.58           |                |                  | 2  |
| 11 |                |                 |                |                  |                |                  | K    | 147.11         | 74.06           | 130.09         | 65.55            |                |                  | 1  |

**Appendix 5b:**
